# Supplementary material for: Sequence specificity is obtained from the majority of modular C2H2 zinc-finger arrays
Source: PubMed Central journal article supplement — Nucleic Acids Res. 2011 Feb 14;39(11):4680–90. doi: 10.1093/nar/gkq1303 (PMC3113560; doi:10.1093/nar/gkq1303), 2011-02-14
Supplement: supp_gkq1303_Supplementary_Document.pdf [file supp_gkq1303_Supplementary_Document.pdf]

pTH5325

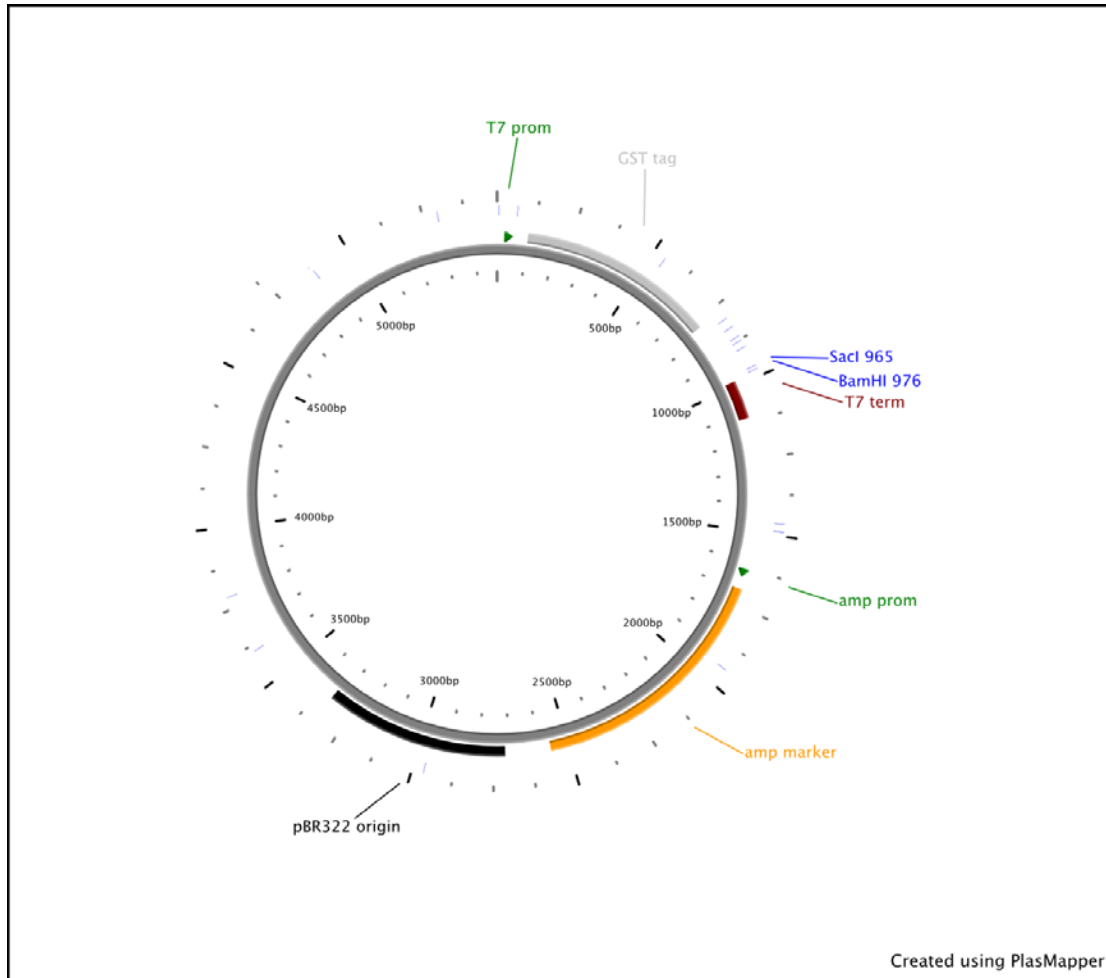

```
LOCUS       dna                5478 bp
FEATURES             Location/Qualifiers
     misc_binding   5..10
                     /dbxref="REBASE:BglII"
     Promoter       25..43
                     /gene="T7 prom"
     misc_binding   63..68
                     /dbxref="REBASE:XbaI"
     Tag            105..768
                     /gene="GST tag"
     ORF            105..989
                     /sequence="ORF_1 rf(3)"
     misc_binding   539..544
                     /dbxref="REBASE:BclI"
     misc_binding   796..803
                     /dbxref="REBASE:NotI"
     misc_binding   824..829
                     /dbxref="REBASE:KpnI"
     misc_binding   858..863
                     /dbxref="REBASE:ApaI"
     misc_binding   877..882
                     /dbxref="REBASE:NcoI"
     misc_binding   897..902
                     /dbxref="REBASE:StuI"
     misc_binding   960..965
                     /dbxref="REBASE:SacI"
     misc_binding   975..980
                     /dbxref="REBASE:BamHI"
```

Terminator 983..1111  
/gene="T7 term"  
misc\_binding 1462..1467  
/dbxref="REBASE:ClalI"  
misc\_binding 1487..1492  
/dbxref="REBASE:EcoRI"  
misc\_binding 1487..1492  
/dbxref="REBASE:ApoI"  
Promoter 1628..1656  
/gene="amp prom"  
Marker 1698..2558  
/gene="amp marker"  
ORF 1698..2558  
/sequence="ORF\_2 rf(3)"  
misc\_binding 1941..1946  
/dbxref="REBASE:HincII"  
Rep\_Origin 2713..3332  
/gene="pBR322 origin"  
misc\_binding 2959..2967  
/dbxref="REBASE:AlwNI"  
misc\_binding 3604..3609  
/dbxref="REBASE:AccI"  
Other Gene 3747..3938  
/gene="ROP other"  
misc\_binding 3784..3789  
/dbxref="REBASE:PvuII"  
ORF 4577..5194  
/sequence="ORF\_3 rf(6)"  
misc\_binding 4876..4881  
/dbxref="REBASE:NruI"  
misc\_binding 5290..5295  
/dbxref="REBASE:SphI"

BASE COUNT 1347 a 1371 c 1471 g 1289 t 0 others  
ORIGIN

```

1 atcgagatct cgatcccgcg aaattaatac gactcactat agggagacca caacggttct
61 cctctagaaa taattttgtt taactttaag aaggagatat acatatgtcc cctatactag
121 gttattggaa aattaagggc cttgtgcaac cactcgcact tcttttggaa tatcttgaag
181 aaaaatatga agagcatttg tatgagcgcg atgaaggatga taaatggcga aacaaaaagt
241 ttgaattggg tttggagttt cccaatcttc ctattatata tgatggtgat gttaaattaa
301 cacagtctat ggcacatcata cgttatatag ctgacaagca caacatggtg ggtggttgtc
361 caaaagagcg tgcagagatt tcaatgcttg aaggagcggg tttggatatt agatacgggtg
421 tttcgagaat tgcatatagt aaagactttg aaactctcaa agttgatttt cttagcaagc
481 tacctgaaat gctgaaaatg ttcgaagatc gtttatgtca taaaacatat ttaaagtgtg
541 atcatgtaac ccactcctgac ttcatggtgt atgacgctct tgatggtgtt ttatacatgg
601 acccaatgtg cctggatgcg ttcccaaaat tagtttgttt taaaaaacgt attgaagcta
661 tcccacaaat tgataagtac ttgaaatcca gcaagtatat agcatggcct ttgcagggct
721 ggcaagccac gtttgggtgt ggcgaccatc ctccaaaatc ggatctgggt cgcgctccat
781 cggagctgaa tccatgcggc cgcaagcttg acgtccatat gctggatacc cgtggaagtc
841 tggaaagtctt cttccagggg cccgaaggag acgcccacat ggggcatatg gtgcacaggc
901 ctttccaatc cgcggccagt taccccaacc ggcccagcaa gacaccccc cgagctgcag
961 agctcgctac gtttggatcc ggtgctaac aaagcccga aggaagctga gttggtgct
1021 gccaccgctg agcaataact agcataacc cttggggcct ctaaaccgggt cttgaggggt
1081 tttttgctga aaggaggaac tatatccgga tatccacagg acgggtgtgg tcgcatgat
1141 cgcgtagtcg atagtggctc caagttagcga agcagcagg actgggaggc ggccaagcg
1201 gtcggacagt gctccgagaa cgggtgcca tagaaattgc atcaacgcat atagcgtag
1261 cagcagcaca tagtgactgg cgatgctgtc ggaatggacg atatcccga agaggcccgg
1321 cagtaccgca ataaccaagc ctatgcctac agcatccagg gtgacggtgc cgaggatgac
1381 gatgagcgca ttgttagatt tcatacacgg tgctgactg cgttagcaat ttaactgtga
1441 taaactaccg cattaaagct tatcgatgat aagctgtcaa acatgagaat tcttgaagac
1501 gaagggcct cgtgatacgc ctatttttat aggttaatgt catgataata atggtttctt
1561 agacgtcagg tggcactttt cggggaaaatg tgcgcggaac ccctatttgt ttattttct
1621 aaatacattc aaatatgtat ccgctcatga gacaataacc ctgataaatg cttcaataat
1681 attgaaaaag gaagagtatg agtattcaac atttccgtgt cgcccttatt ccctttttt
1741 cggcattttg ccttctctgt tttgctcacc cagaaacgct ggtgaaagta aaagatgctg
1801 aagatcagtt ggggtgcacga gtgggttaca tgaactgga tctcaacagc ggtaagatcc
1861 ttgagagttt tcgccccgaa gaacgttttc caatgatgag cactttttaa gttctgctat
1921 gtggcgcggt attatcccgt gttgacgccc ggcaagagca actcggctgc cgcatacact
1981 attctcagaa tgacttgggt gagtactcac cagtcacaga aaagcatctt acggatggca
2041 tgacagtaag agaattatgc agtgctgcca taacctgag tgataaacct cgggccaact
2101 tacttctgac aacgatcgga ggaccgaagg agctaaccgc ttttttgcac aacatggggg
2161 atcatgtaac tcgccttgat cgttgggaac cggagctgaa tgaagccata ccaaacgacg

```

2221 agcgtgacac cacgatgcct gcagcaatgg caacaacgtt gcgcaaaacta ttaactggcg  
2281 aactacttac tctagcttcc cggcaacaat taatagactg gatggaggcg gataaagttg  
2341 caggaccact tctgcgctcg gcccttccgg ctggctgggt tattgctgat aaatctggag  
2401 ccggtgagcg tgggtctcgc ggtatcattg cagcactggg gccagatggt aagcctccc  
2461 gtatcgtagt tatctacacg acggggagtc aggcaactat ggatgaacga aatagacaga  
2521 tcgctgagat aggtgcctca ctgattaagc attggtaact gtcagaccaa gtttactcat  
2581 atatacttta gattgattta aaacttcatt ttaatttaa aaggatctag gtgaagatcc  
2641 tttttgataa tctcatgacc aaaatccctt aacgtgagtt ttcgttccac tgagcgtcag  
2701 accccgtaga aaagatcaaa ggatcttctt gagatccttt ttttctgcmc gtaatctgct  
2761 gcttgcaaac aaaaaacca ccgctaccag cggtggtttg tttgcccgat caagagctac  
2821 caactctttt tccgaaggtg actggcttca gcagagcgca gataccaaat actgtccttc  
2881 tagttagctt ctgattagcc caccacttca agaactctgt agcaccgcct acatacctcg  
2941 ctctgctaata cctgttacca gtggctgctg ccagtgccga taagtcgtgt cttaccgggt  
3001 tggactcaag acgatagtta ccgataaagg ccagcggctc gggctgaacg gggggttcgt  
3061 gcacacagcc cagcttggag cgaacgacct acaccgaact gagataccta cagcgtgagc  
3121 catgagaaa cgccacgctc cccgaaggga gaaaggcgga caggatcccg gtaagcggca  
3181 gggctcggaac aggagagcgc acgagggagc ttccaggggg aaacgcctgg tatctttata  
3241 gtcctgctcg gtttcgccac ctctgacttg agcgtcgatt tttgtgatgc tcgtcagggg  
3301 ggcggagcct atggaaaaac gccagcaacg cggccttttt acgggttctg gccttttctg  
3361 ggcccttttg tccatgttcc tttcctgctg tatcccctga tctctgggat aaccgtatta  
3421 ccgcttttga gtgagctgat accgctcgcc gcagccgaac gaccgagcgc agcagctcag  
3481 tgagcgagga agcgaagag cgctgatgac ggtatcttct ccttacgcat ctgtcgggta  
3541 tttcacaccg catatatggt gcactctcag tacaatctgc tctgatgccc catagttaag  
3601 ccagataaac ctcgctatc gctacgtgac tgggtcatgg ctgcccctcg acaccgccca  
3661 acaccgctg acgcgccctg acgggcttgt ctgctcccgg catccgctta cagacaagct  
3721 gtgaccgtct ccgggagctg catgtgtcag aggttttccac cgctcatcacc gaaacgcgcy  
3781 aggcagctgc ggtaaaagctc atcagcgtgg tcgtgaagcg attcacagat gtctgcctgt  
3841 tcatcccgct tctgctaac agtatttctcc agaagcgtaa atgtctggct tctgataaag  
3901 cgggcatatg taagggcggt ttttctctgt ttggctactg atgcctccgt gtaaggggga  
3961 tttctgttca tgggggtaat gataccgatg aaacgagaga ggatgctcac gatacggggt  
4021 actgatgatg aacatgcccg gttactggaa cgttgtgagg gtaaaact gggggtatgg  
4081 atgcggcggt aacagagaaa aatcactcag ggtcaatgcc agcgtctcgt taatacagat  
4141 gtaggtgttc cacagggtag ccagcagcat cctgcatgac agatccggaa cataatgggtg  
4201 cagggcgctg acttccgctt ttccagactt tacgaaacac ggaacccgaa gaccattcat  
4261 gttgttgctc aggtcgcaga cgttttgtag cagcagctgc ttcacgttctg ctgctgctatc  
4321 ggtgattcat tctgctaacc agtaaggcaa cccgcccagc ctgagccgggt cctcaacgac  
4381 aggagcacga tcatgcccac ccgtggccag gacccaacgc tgcccagatg cgcgccgctg  
4441 cggctgctgg agatggcgga ccgatggat atgttctgccc aagggttgggt ttgcccattc  
4501 acagtctctc gcaagaattg attggctcca attcttggag tgggtgaatcc gttagcaggg  
4561 tcccgccgct ttccattcag gtcgaggtgg cccggctcca tgcaccgcca cgcaccgcy  
4621 ggagcagac aaggatatag gcgccgctca caatccatgc caaccgcttc catgtgctcg  
4681 ccgagccgccc ataaatcgcc gtgacgatca cgggtccagt gatcgaagtt aggctggtaa  
4741 gagccgagc cgatccttga agctgtccct gatggctgct atctacctgc ctggacagca  
4801 tggctgcaaa cgcgggcatc ccgatgccc cggagcgag aagaatcata atggggaagg  
4861 ccattccagcc tccgctcgcg aacgccagca agacgtagcc cagcgcgctcg gccgccatgc  
4921 cggcgataat ggcctgcttc tcccgaaac gtttgggtggc gggaccagtg acgaaggctt  
4981 gagcgagggc gtgcaagatt ccgaataccg caagcgacag gccgatcatc gtcgctctcc  
5041 agcgaaggcg gtcctcgccc aaaatgacct agagcgtgct cggcacctgt cctacgagtt  
5101 gcatgataaa gaagacagtc ataagtgcgg cgacgatagt catgcccgcg gccaccgga  
5161 aggagctgac tgggttgaag gctctcaagg gcacggctcg atcgacgctc tcccttatgc  
5221 gactcctgca ttaggaagca gccagtagt aggttgaggc cgttgagcac cgcccgcga  
5281 aggaatgggt catgcaagga gatggcgccc aacagtcccc cggccacggg gcctgccacc  
5341 ataccacgc cgaaacaagc gctcatgagc ccgaagtggc gagcccgatc tcccctatcg  
5401 gtgatgctcg cgatatagcc gccagcaacc gcacctgtgg ccgcccgtgat gccggccacg  
5461 atgcgtccgg cgtagagg

//

The following pages contain up to ten aligned 8-mers for each successful ZFA. The logos were generated using WebLogo3 (Crooks GE, Hon G, Chandonia JM, Brenner SE WebLogo: A sequence logo generator, *Genome Research*, 14:1188-1190 (2004)).

Both “forward” and “reverse complement” orientations are given.

Labels are as follows:

E\_1514\_1M-HK\_pTH5470.3\_ZFA1

E: E-score

1514: Experiment name

1M-HK: Array design (either HK or ME)

pTH5470.3: Plasmid and protein (i.e. this is the third protein sample produced from pTH5470)

ZFA1: ZFA identifier, following Ramirez et al. numbering

| Alignment Fwd                                                                                                                                      | Logo Fwd | Alignment Rev                                                                                                                                      | Logo Rev |
|----------------------------------------------------------------------------------------------------------------------------------------------------|----------|----------------------------------------------------------------------------------------------------------------------------------------------------|----------|
| <b>E_1514_1M-HK_pTH5470.3_ZFA1</b>                                                                                                                 |          |                                                                                                                                                    |          |
| GCAGCACC<br>GCAACACC<br>GGTGCACC                                                                                                                   |          | GGTGCTGC<br>GGTGTTCG<br>GGTGCACC                                                                                                                   |          |
| <b>E_2953_1M-HK_pTH5471.2_ZFA2</b>                                                                                                                 |          |                                                                                                                                                    |          |
| TGCAGCCC-<br>-GCAGCCCT<br>-GCAGCCCC<br>AGCAGCCC-<br>-GGAGGACA<br>-GCAGCCCA<br>-ACAGCCCA<br>GGCAGCCC-<br>AACAGCCC-<br>GACAGCCC-                     |          | -GGGCTGCA<br>AGGGCTGC-<br>GGGGCTGC-<br>-GGGCTGCT<br>TGTCTCC-<br>TGGGCTGC-<br>TGGGCTGT-<br>-GGGCTGCC<br>-GGGCTGTT<br>-GGGCTGTC                      |          |
| <b>E_3103_1M-HK_pTH5421.4_ZFA3</b>                                                                                                                 |          |                                                                                                                                                    |          |
| ACATGCAG-<br>-CGTGCAGC<br>-CATGCAGC<br>-GCTGCAGC                                                                                                   |          | -CTGCATGT<br>GCTGCAGC-<br>GCTGCATG-<br>GCTGCAGC-                                                                                                   |          |
| <b>E_1115_1M-HK_pTH5422.2_ZFA4</b>                                                                                                                 |          |                                                                                                                                                    |          |
| --AGGGATGT<br>ATAGGGTA--<br>CTAGGGTA--<br>-TAGGGTAC-<br>-TAGGGATG-                                                                                 |          | ACATCCCT--<br>--TACCCTAT<br>--TACCCTAG<br>-GTACCCTA-<br>-CATCCCTA-                                                                                 |          |
| <b>E_1118_1M-HK_pTH5423.2_ZFA5</b>                                                                                                                 |          |                                                                                                                                                    |          |
| --CCCGCTCC-<br>--CCCGCACC-<br>-ACCCGCAC--<br>-ACCCGCTC--<br>--TCCGCTCC-<br>ATCCCGCA---<br>---CCGCTCCA<br>---CCGCTCCC<br>AACCCGCA---<br>-ACCCGCTT-- |          | -GGAGCGGG--<br>-GGTGCGGG--<br>--GTGCGGGT-<br>--GAGCGGGT-<br>-GGAGCGGA--<br>---TGCGGGAT<br>TGGAGCGG---<br>GGGAGCGG---<br>---TGCGGGTT<br>--AAGCGGGT- |          |

| Alignment Fwd                                                                                                                               | Logo Fwd | Alignment Rev                                                                                                                                | Logo Rev |
|---------------------------------------------------------------------------------------------------------------------------------------------|----------|----------------------------------------------------------------------------------------------------------------------------------------------|----------|
| <b>E_1121_1M-HK_pTH5424.2_ZFA7</b>                                                                                                          |          |                                                                                                                                              |          |
| <pre> -CCCTCCC- GCCCTCC- --CCCTCCC TCCCTCC- --CCCTCCCT -CCCTCCT- -CCCTCCG- TGCCCTCC- -GCCTCCC- CCCTCCTC- </pre>                             |          | <pre> -GGGAGGG- --GGAGGGC GGGAGGG- --GGAGGGGA AGGGAGGG- -AGGAGGG- -CGGAGGG- --GGAGGGCA -GGGAGGG- --GGAGGGG </pre>                            |          |
| <b>E_1124_1M-HK_pTH5425.2_ZFA8</b>                                                                                                          |          |                                                                                                                                              |          |
| <pre> ---GCATCCCC- ---GCATCTCC- ---GCATCACC- GATGCATC--- --TGCATCCC- ----CATCCCC ---GCAGCACC- ---GCATCCTC- ---ACATCCCC- ---ACATCACC- </pre> |          | <pre> -GGGGATGC--- -GGAGATGC--- -GGTGATGC--- ---GATGCATC --GGATGCA--- GGGGATG---- -GGTGCTGC--- -GAGGATGC--- -GGGGATGT--- -GGTGATGT--- </pre> |          |
| <b>E_2954_1M-HK_pTH5426.2_ZFA10</b>                                                                                                         |          |                                                                                                                                              |          |
| <pre> --CGCTCCCC- ---GCTCCTCC ---GCTCCGCC --CTCCGCC- ---GCTCCCC -ACGCTCCC- --CTCTCCC- --CGCTCCTC- --CGCTCCGC- TACGCTCC--- </pre>            |          | <pre> -GGGGAGCG-- GGAGGAGC--- GGCGGAGC--- -GGGCGGAG-- GGGGGAGC--- --GGGAGCGT- -GGGAGGAG-- -GAGGAGCG-- -GCGGAGCG-- ---GGAGCGTA </pre>         |          |
| <b>E_1126_1M-HK_pTH5428.2_ZFA15</b>                                                                                                         |          |                                                                                                                                              |          |
| <pre> -CCCGCTGC- --CCGCTGCA -CCCGCTGG- --CCGCTGGC ACCCGCTG-- CCCGCTG-- GCCCGCTG-- -ACCGCTGC- -TCCGCTGC- -CCCGCAGC- </pre>                   |          | <pre> -GCAGCGGG- TGACGCGG-- -CCAGCGGG- CGCAGCGG-- --CAGCGGGT --CAGCGGGG --CAGCGGGC -GCAGCGGT- -GCAGCGGA- -GCTGCGGG- </pre>                   |          |
| <b>E_2956_1M-HK_pTH5473.2_ZFA24</b>                                                                                                         |          |                                                                                                                                              |          |
| <pre> --GAGAAGAG --GGAGAAGA- TGGAGAAG-- CGGAGAAG-- --GAGAGGAG GGGAGAAG-- --GAGAAGCG --GGAGAAGC- --GAGAAGT- --GAGAAGTG </pre>                |          | <pre> CTCTTCTC-- -TCTTCTCC- --CTTCTCCA --CTTCTCCG CTCTTCTC-- --CTTCTCCC CGTCTTCTC- -GCTTCTCC- -ACTTCTCC- CACTTCTC-- </pre>                   |          |

| Alignment Fwd                                                                                                                             | Logo Fwd | Alignment Rev                                                                                                                            | Logo Rev |
|-------------------------------------------------------------------------------------------------------------------------------------------|----------|------------------------------------------------------------------------------------------------------------------------------------------|----------|
| <b>E_1068_1M-HK_pTH5569.2_ZFA45</b>                                                                                                       |          |                                                                                                                                          |          |
| ATCTATAT--<br>ATCTACAT--<br>--CTATATAG<br>TGCTACAT--<br>-TCTACATT-<br>-TCTACATG-<br>ATCTAGAT--<br>TTCTACAT--<br>-TCTATATA-<br>-TCTATATG-  |          | --ATATAGAT<br>--ATGTAGAT<br>CTATATAG--<br>--ATGTAGCA<br>-AATGTAGA-<br>-CATGTAGA-<br>--ATCTAGAT<br>--ATGTAGAA<br>-TATATAGA-<br>-CATATAGA- |          |
| <b>E_1070_1M-HK_pTH5571.2_ZFA57</b>                                                                                                       |          |                                                                                                                                          |          |
| ---CGTCCTCT<br>--CCGTCCTC-<br>--ACGTCCTC-<br>---CGTCCTCC<br>-ACCGTCCA--<br>--TCGTCCTC-<br>---CGTCCTCG<br>AACCGTCC---                      |          | AGAGGACG---<br>-GAGGACGG--<br>-GAGGACGT--<br>GGAGGACG---<br>---TGGACGGT-<br>-GAGGACGA--<br>CGAGGACG---<br>---GGACGGTT                    |          |
| <b>E_1073_1M-HK_pTH5574.2_ZFA75</b>                                                                                                       |          |                                                                                                                                          |          |
| --GGGATCCC<br>CCGGCATC--<br>--CGGCATCC-<br>--GGCATCCT<br>TCGGCATC--<br>--GGCATCCC<br>GCGGCATC--<br>-CGGCATCG-<br>-CGGCATCA-<br>-CGGCATCT- |          | GGGATCCC--<br>--GATGCCGG<br>-GGATGCCG-<br>AGGATGCC--<br>--GATGCCGA<br>GGGATGCC--<br>--GATGCCGC<br>-CGATGCCG-<br>-TGATGCCG-<br>-AGATGCCG- |          |
| <b>E_1086_1M-HK_pTH5576.2_ZFA93</b>                                                                                                       |          |                                                                                                                                          |          |
| -ACCGCTTC-<br>--CCGCTTCA<br>--CCGCTTCG<br>-TCCGCTTC-<br>-GCCGCTTC-<br>--CCGCTTCC<br>--CCGCTTCT<br>GACCGCTT--<br>-ACCGCATC-<br>-CCGCTTTC-  |          | -GAAGCGGT-<br>TGAAGCGG--<br>CGAAGCGG--<br>-GAAGCGGA-<br>-GAAGCGGC-<br>GGAAGCGG--<br>AGAAGCGG--<br>--AAGCGGTC<br>-GATCGGGT-<br>-GAAGCGGG- |          |
| <b>E_1076_1M-HK_pTH5578.2_ZFA107</b>                                                                                                      |          |                                                                                                                                          |          |
| -GAGGTTGC<br>-GAGGTGGT<br>TGAGGTTG-<br>-GAGGTTGT<br>-GAGGCTGC<br>-GAGGTAGC<br>-GAGGTAGT<br>-GAGGTGGC<br>-GAGGCCGT<br>GGAGGTTG-            |          | GCAACCTC-<br>ACCACCTC-<br>-CAACCTCA<br>ACAACCTC-<br>GCAGCCTC-<br>GCTACCTC-<br>ACTACCTC-<br>GCCACCTC-<br>ACCGCTC-<br>-CAACCTCC            |          |

| Alignment Fwd                                                                                                                             | Logo Fwd | Alignment Rev                                                                                                                           | Logo Rev |
|-------------------------------------------------------------------------------------------------------------------------------------------|----------|-----------------------------------------------------------------------------------------------------------------------------------------|----------|
| <b>E_1077_1M-HK_pTH5580.2_ZFA145</b>                                                                                                      |          |                                                                                                                                         |          |
| <pre> CCCATTCC- --CCATTCCA --CCCTTCCG CCCTTCC- --CCTTCCCC --CCGTTCCA ACCTTTC- --CCTTCCCG ACCCTTCC- GCCTTTC- </pre>                        |          | <pre> --GGAATGGG TGGAAATGG- CGGAAGGG- --GGAAGGGG GGGAAAGG- TGGAACGG- --GGAAGGT CGGAAAGG- --GGAAGGGT --GGAAGGCC </pre>                   |          |
| <b>E_1079_1M-HK_pTH5581.2_ZFA152</b>                                                                                                      |          |                                                                                                                                         |          |
| <pre> --CCACCGCA-- --CACCGCAC- ---ACCGCACT ---CACCGCAG- CCCACCGC--- ---ACCGCAGT ACCACCGC--- ---TACCGCAG- ---ACCGCACC --ACACCGCA-- </pre>  |          | <pre> --TGCGGTGG- --GTGCGGTG-- AGTGCGGT--- --CTGCGGTG-- ---GCGGTGGG ACTGCGGT--- ---GCGGTGGT --CTGCGGTA-- GGTGCGGT--- --TGCGGTGT- </pre> |          |
| <b>E_1080_1M-HK_pTH5582.2_ZFA160</b>                                                                                                      |          |                                                                                                                                         |          |
| <pre> GCTATAGC--- --TATAGCGA- --CTATAGCG-- --ATAGCGAG --TTATAGCG-- --CATAGCAG- --CATAGCGA- GTATAGC--- GTTATAGC--- --CGTAGCG-- </pre>      |          | <pre> ---GCTATAGC --TCGCTATA-- --CGCTATAG- CTCGCTAT--- --CGCTATAA- --CTGCTATG-- --TCGCTATG-- ---GCTATGAC ---GCTATAAC --CGTAGCG-- </pre> |          |
| <b>E_1096_1M-HK_pTH5584.2_ZFA169</b>                                                                                                      |          |                                                                                                                                         |          |
| <pre> --ACCGCACC-- --GCCGCACC-- --CCGCACCG- --GCCACACC-- --ACCACACC-- --CCGCACCC- CACCGCAC--- --CCGCACCA- ---CGCACCGC --ACCGCTCC-- </pre> |          | <pre> --GGTGCGGT- --GGTGCGGC- --CGGTGCGG-- --GGTGTGGC- --GGTGTGGT- --GGGTGCGG-- ---GTGCGGTG --TGGTGCGG-- GCGGTGCG--- --GGAGCGGT- </pre> |          |
| <b>E_1515_1M-HK_pTH5585.4_ZFA188</b>                                                                                                      |          |                                                                                                                                         |          |
| <pre> --GAGTAATC- --GACTAAGT- TGACTAAG-- GGACTAAG-- --AGTAATC- --GACTAAGC- --ACTTAATC- --GAGTAACC- --AGTAATCA --AGTAATCC </pre>           |          | <pre> --GATTACTC- --ACTTAGTC- --CTTAGTCA --CTTAGTCC --GATTACTT- --GCTTAGTC- --GATTAAGT- --GGTTACTC- TGATTACT-- GGATTACT-- </pre>        |          |



| Alignment Fwd                                                                                                                                                                   | Logo Fwd | Alignment Rev                                                                                                                                                              | Logo Rev |
|---------------------------------------------------------------------------------------------------------------------------------------------------------------------------------|----------|----------------------------------------------------------------------------------------------------------------------------------------------------------------------------|----------|
| <b>E_1498_1M-ME_pTH5470.3_ZFA1</b>                                                                                                                                              |          |                                                                                                                                                                            |          |
| <pre> -----GGTGCACC--- -----GCAGCACC--- -----GTAGCACC--- -----GCAACACC--- -----GCACCATT -----GGAGCACC--- -----GGGTGCAC--- -----AAAGGGAT--- CAAAGGGA----- -----GTGCACCA-- </pre> |          | <pre> -----GGTGCACC--- -----GGTGTGC--- -----GGTGTAC--- -----GGTGTTC--- AATGGTGC----- -----GGTGTCC--- -----GTGCACCC--- -----ATCCCTTT--- -----TCCCTTTG --TGGTGAC----- </pre> |          |
| <b>E_0493_1M-ME_pTH5471.1_ZFA2</b>                                                                                                                                              |          |                                                                                                                                                                            |          |
| <pre> TAGGGCTG-- -AGGGCTGC- -AGGGCTGT- --GGGCTGTC --GGGCTGCT --GGGCTGCA --GGGCTGTT -TGGGCTGC- -GGGGCTGC- -TGGGCTGT- </pre>                                                      |          | <pre> --CAGCCCTA -GCAGCCCT- -ACAGCCCT- GACAGCCC-- AGCAGCCC-- TGCAGCCC-- AACAGCCC-- -GCAGCCCA- -GCAGCCCC- -ACAGCCCA- </pre>                                                 |          |
| <b>E_0496_1M-ME_pTH5421.1_ZFA3</b>                                                                                                                                              |          |                                                                                                                                                                            |          |
| <pre> CGTGCAGC CATGCAGC </pre>                                                                                                                                                  |          | <pre> GCTGCAGC GCTGCATG </pre>                                                                                                                                             |          |
| <b>E_0497_1M-ME_pTH5422.1_ZFA4</b>                                                                                                                                              |          |                                                                                                                                                                            |          |
| <pre> --GGATCCCT-- GGGATCCC--- --CGACCCTA- --GTACCCTA- --GGTCCCTA- ---GACCCTTT </pre>                                                                                           |          | <pre> --AGGGATCC- ---GGGATCCC --TAGGGTCC- --TAGGGTAC- --TAGGGACC- AAAGGGTC--- </pre>                                                                                       |          |
| <b>E_0350_1M-ME_pTH5423.1_ZFA5</b>                                                                                                                                              |          |                                                                                                                                                                            |          |
| <pre> ---CCCCTCC- --TCCCGCTC-- ---TCCGCTCC- ----CCGCTCCC --TCCCGCAC-- ---CCCGCACCC- ---CCCCTTTC- CGTCCCGC--- CATCCCGC--- -GTCCCACA--- </pre>                                    |          | <pre> --GGAGCGGG-- --GAGCGGGA-- --GGAGCGGA-- GGGAGCGG--- --GTGCGGGA-- --GGTGCGGG-- --GAAGCGGG-- ---GCGGGACG ---GCGGGATG ---TGCGGGAC- </pre>                                |          |

| Alignment Fwd                                                                                                                                 | Logo Fwd | Alignment Rev                                                                                                                                  | Logo Rev |
|-----------------------------------------------------------------------------------------------------------------------------------------------|----------|------------------------------------------------------------------------------------------------------------------------------------------------|----------|
| <b>E_0351_1M-ME_pTH5424.1_ZFA7</b>                                                                                                            |          |                                                                                                                                                |          |
| <pre> ACCCCTCC-- --CCCTCCC- --CCCTCCT- --CCCTCCCT TCCCTCC-- GCCCTCC-- --CCCTCCA- --CCCTCAA --CCCTCCCC --CCCTCCG-</pre>                        |          | <pre> --GGAGGGGT --GGAGGGG- --AGGAGGG- AGGGAGGG-- --GGAGGGGA --GGAGGGGC --TGGAGGG- TTGGAGGG-- GGGAGGG-- --CGAGGGG-</pre>                       |          |
| <b>E_0352_1M-ME_pTH5425.1_ZFA8</b>                                                                                                            |          |                                                                                                                                                |          |
| <pre> ---GCATCACC- ---ACATCACC- --TGCATCAC-- ---ACATCCCC- ----CATCACCC ---GCATCCCC- GATGCATC---- ---ACATCTCC- ----CATCCCCC --GTGCATCC--</pre> |          | <pre> --GGTGATGC--- --GGTGATGT--- --GTGATGCA-- --GGGATGT--- GGGTGATG---- --GGGATGC--- ----GATGCATC --GGAGATGT--- GGGGATG---- --GGATGCAC-</pre> |          |
| <b>E_0353_1M-ME_pTH5426.1_ZFA10</b>                                                                                                           |          |                                                                                                                                                |          |
| <pre> ---GCTCCGCC- ---GCTCCTCC- --CGTCCGC-- ----CTCCGCCC ----CTCCTCCC ----CTCCGCCA --CGTCCCC-- AAGCTCC---- --ACGCTCCG-- --ACGCTCCC--</pre>    |          | <pre> --GGCGGAGC--- --GGAGGAGC--- --GCCGAGCG-- GGCGGAG--- GGGAGGAG--- TGGCGGAG--- --GGGAGCG-- ----GGAGCGTT --CGGAGCGT- --GGGAGCGT-</pre>       |          |
| <b>E_0355_1M-ME_pTH5428.1_ZFA15</b>                                                                                                           |          |                                                                                                                                                |          |
| <pre> --CCGCTGC-- --CCGCTGCA- GCCCGCTG--- --CCGCTGCG- --TCCGCTGC-- TCCCGCTG--- CCCCGCTG--- --CCGCTGCC- --CGCTGCAT --CCGCTGG--</pre>           |          | <pre> --GCAGCGGG- --TGCAGCGG-- ---CAGCGGGC --CCGAGCGG-- --GCAGCGGA- ---CAGCGGGA ---CAGCGGGG --GCCAGCGG-- ATGCAGCG--- --CCAGCGGG-</pre>         |          |
| <b>E_0495_1M-ME_pTH5473.1_ZFA24</b>                                                                                                           |          |                                                                                                                                                |          |
| <pre> --GCTTTTCC-- CTCTTCTC--- --CTTCTCCC- --CTTTTCCC- ---TTTCCCC --ACTTCTCC- --CTTCTCCG- CGTTTCTC--- --CTTCTCCT- CCCTTCTC---</pre>           |          | <pre> --GGAAAAGC- ---GAGAAGAG --GGGAGAAG-- --GGGAAAAG-- GGGGAAAA--- --GGAGAAGT- --CGGAGAAG-- --GAGAAGCG --AGGAGAAG-- ---GAGAAGGG</pre>         |          |

| Alignment Fwd                                                                                                                | Logo Fwd | Alignment Rev                                                                                                                | Logo Rev |
|------------------------------------------------------------------------------------------------------------------------------|----------|------------------------------------------------------------------------------------------------------------------------------|----------|
| <b>E_1052_1M-ME_pTH5569.1_ZFA45</b>                                                                                          |          |                                                                                                                              |          |
| <pre>--ATGTAGAT CTATATAG-- --ATATAGAT --AATGTAGA- --AATATAGA- --ATATAGCA --TATATAGA- --ATGTAGCA --ATCTAGAT --CATGTAGA-</pre> |          | <pre>ATCTACAT-- --CTATATAG ATCTATAT-- --TCTACATT- --TCTATATT- TGCTATAT-- --TCTATATA- TGCTACAT-- ATCTAGAT-- --TCTACATG-</pre> |          |
| <b>E_1054_1M-ME_pTH5571.1_ZFA57</b>                                                                                          |          |                                                                                                                              |          |
| <pre>AGAGGACG- -GAGGACGT</pre>                                                                                               |          | <pre>-CGTCCTCT ACGTCCTC-</pre>                                                                                               |          |
| <b>E_1057_1M-ME_pTH5574.1_ZFA75</b>                                                                                          |          |                                                                                                                              |          |
| <pre>--CGGCATCC- CCGGCATC-- GCGGCATC-- --GGCATCCT TCGGCATC-- --CGGCATCT- --CGGCATCA- --GGCATCAT --GGCATCCC --GGCATCAC</pre>  |          | <pre>--GGATGCCG- --GATGCCGG --GATGCCGC AGGATGCC-- --GATGCCGA --AGATGCCG- --TGATGCCG- ATGATGCC-- GGGATGCC-- GTGATGCC--</pre>  |          |
| <b>E_0953_1M-ME_pTH5576.1_ZFA93</b>                                                                                          |          |                                                                                                                              |          |
| <pre>--CCGCTTCA --ACCGCTTC- --GCCGCTTC- --TCCGCTTC- --CCGCTTCG --CCGCTTCT --CCGCTTCC --CCGCTTTC- GTCGCTT-- GACCGCTT--</pre>  |          | <pre>TGAAGCGG-- --GAAGCGGT- --GAAGCGGC- --GAAGCGGA- CGAAGCGG-- AGAAGCGG-- GGAAGCGG-- --GAAGCGGG- --AAGCGGAC --AAGCGGTC</pre> |          |
| <b>E_0955_1M-ME_pTH5578.1_ZFA107</b>                                                                                         |          |                                                                                                                              |          |
| <pre>ACCACCTC- GCAACCTC- ACAACCTC- ACTACCTC- GCCACCTC- GCTACCTC- --CCACCTCC ACAGCCTC- ACCTCCTT- ACGCCTC-</pre>               |          | <pre>--GAGGTGGT --GAGGTTGC --GAGGTTGT --GAGGTAGT --GAGGTGGC --GAGGTAGC GGAGGTGG- --GAGGCTGT --AAGGAGGT --GAGGCGGT</pre>      |          |

| Alignment Fwd                                                                                                                                | Logo Fwd | Alignment Rev                                                                                                                                | Logo Rev |
|----------------------------------------------------------------------------------------------------------------------------------------------|----------|----------------------------------------------------------------------------------------------------------------------------------------------|----------|
| <b>E_0957_1M-ME_pTH5580.1_ZFA145</b>                                                                                                         |          |                                                                                                                                              |          |
| <pre> --CCTTTCG-- --CGTTCCA-- --CCTTCCA-- ACCTTTCC-- --CTTTCCAC CCCTTTCC-- GCCTTTCC-- --CCTTCCAC GGAATTCC-- --CCATTCCA-- </pre>              |          | <pre> --CGAAAGG-- --TGGAACGG-- --TGGAAAGG-- --GAAAGGT GTGGAAG-- --GAAAGGG --GAAAGGC GTGGAAG-- --GGAATTCC --TGGAATGG-- </pre>                 |          |
| <b>E_0958_1M-ME_pTH5581.1_ZFA152</b>                                                                                                         |          |                                                                                                                                              |          |
| <pre> --CACCGCAC-- ---ACCGCAAT CCCACCGC--- --TTACCGCA-- --TACCGCAG-- ---ACCGCATT --CCACCGCA-- ---ACCGCACT ---ACCGCAGT --GCACCGCA-- </pre>    |          | <pre> --GTGCGGTG-- ATTGCGGT--- ---GCGGTGGG --TGCGGTAA-- --CTGCGGTA-- AATGCGGT--- --TGCGGTGG-- AGTGCGGT--- ACTGCGGT--- --TGCGGTGC-- </pre>    |          |
| <b>E_0959_1M-ME_pTH5582.1_ZFA160</b>                                                                                                         |          |                                                                                                                                              |          |
| <pre> ---GCTATAGC --TGCTATAA-- ---GCTATAAC --CTGCTATG-- --CTGCTATA-- --CGCTATAG-- --CGTATAAA-- CTCGCTAT--- CTCGCTAG--- --CGTATAT-- </pre>    |          | <pre> GCTATAGC--- --TTATAGCA-- GTTATAGC--- --CATAGCAG-- --TATAGCAG-- --CTATAGCG-- --TTATAGCG-- ---ATAGCGAG ---CTAGCGAG --ATATAGCG-- </pre>   |          |
| <b>E_0961_1M-ME_pTH5584.1_ZFA169</b>                                                                                                         |          |                                                                                                                                              |          |
| <pre> --ACCACACC-- --ACCGCACC-- --ACCGCTCC-- --CACCGCAC-- --ACCGCACT-- ---CCGCACCA --ACCGCAAT-- --ACCACTCC-- --GCCGCACC-- CCACCGCA--- </pre> |          | <pre> --GGTGTGGT-- --GGTGCGGT-- --GGAGCGGT-- --GTGCGGTG-- --AGTGCGGT-- TGGTCCGG--- --ATTGCGGT-- --GGAGTGGT-- --GGTCCGGC-- ---TGCGGTGG </pre> |          |
| <b>E_1499_1M-ME_pTH5585.4_ZFA188</b>                                                                                                         |          |                                                                                                                                              |          |
| <pre> --GACTAAGT --GATTACTC --GACTAAGC TGACTAAG- GGATTACG- --GATTACGC --GGTACTCT --GATTACGT --GATTAAGC GGATTACT- </pre>                      |          | <pre> ACTTAGTC- GAGTAATC- GCTTAGTC- --CTTAGTCA --CGTAATCC GCGTAATC- GAGTAACC- ACGTAATC- GCTTAATC- --AGTAATCC </pre>                          |          |

| Alignment Fwd                                                                                                                                                                   | Logo Fwd | Alignment Rev                                                                                                                                                                  | Logo Rev |
|---------------------------------------------------------------------------------------------------------------------------------------------------------------------------------|----------|--------------------------------------------------------------------------------------------------------------------------------------------------------------------------------|----------|
| <b>E_1514_1M-HK_pTH5470.3_ZFA1</b>                                                                                                                                              |          |                                                                                                                                                                                |          |
| <pre> ----GCACCATT -GCAACACCA--- ---TGCACCATT- ---CAAAAGGAA-- -GCACCCTT--- -GTTGCACCC--- -GCAGCACCA--- --GTGCACCAT-- GGCAGCACC--- -GCAGCACCC--- </pre>                          |          | <pre> AAATGGTGC---- ---TGGTGTTC- -AATGGTGCA--- ---TTCCTTTTG-- ---AAGGGGTGC- ---GGTGCAAC- ---TGGTGTTC- ---ATGGTGAC-- ---GGTGTGCC- ---GGTGTTC- </pre>                            |          |
| <b>E_2953_1M-HK_pTH5471.2_ZFA2</b>                                                                                                                                              |          |                                                                                                                                                                                |          |
| <pre> --GGAGGACAA -AGGGCTGCT- --GTCCATCAT -GGGGCTGCA- TAGGGCTGC-- -AGGGCTGCA- --GGGCTGCAC TGGGGCTGC-- AAGGGCTGC-- --GGGCTGTCT </pre>                                            |          | <pre> TTGTCTCC-- -AGCAGCCCT- ATGGAGGAC-- -TGCAGCCCC- --GCAGCCCTA -TGCAGCCCT- GTGCAGCCC-- --GCAGCCCCA --GCAGCCCTT AGACAGCCC-- </pre>                                            |          |
| <b>E_3103_1M-HK_pTH5421.4_ZFA3</b>                                                                                                                                              |          |                                                                                                                                                                                |          |
| <pre> -CCGTGCAGC-- --CATGCAGCG- -CCGATCAGC-- --CATGCAGCA- -ACATGCAGC-- ---CTGCAGCGC --CATGCAGTA- --CGAGCAGCA- TACATGCAG--- -GCTGCAGCG- </pre>                                   |          | <pre> --GCTGCACGG- -CGCTGCATG-- --GCTGATCGG- -TGCTGCATG-- --GCTGCATGT- GCGCTGCAG--- -TACTGCATG-- -TGCTGTCTG-- ---CTGCATGTA -CGCTGCAGC-- </pre>                                 |          |
| <b>E_1115_1M-HK_pTH5422.2_ZFA4</b>                                                                                                                                              |          |                                                                                                                                                                                |          |
| <pre> ----GTGTACACG--- -CTAGGGTAA----- --TAGGGTAAA----- --TAGGGTATG----- -----TATAAAGGG CATAAAGTA----- --TAGGGTATA----- -GTAGGGATG----- --TAGGGTACA----- -CTAGGGTAT----- </pre> |          | <pre> ---CGTGTACAC--- -----TTACCCTAG- -----TTTACCCTA-- -----CATACCCTA-- CCCTTTATA----- -----TACCTTATG -----TATACCCTA-- -----CATCCCTAC- -----TGTACCCTA-- -----ATACCCTAG- </pre> |          |
| <b>E_1118_1M-HK_pTH5423.2_ZFA5</b>                                                                                                                                              |          |                                                                                                                                                                                |          |
| <pre> --CCCGCTCCC -ACCGCTCC- --CCCGCTCCG -GCCCGCTCC- --CCCGCTCC- --CCCGCTCCA ATCCCGCTC-- -ACCGCACC- -ACCGCTTC- --CCCGCTCCT </pre>                                               |          | <pre> GGGAGCGGG-- --GGAGCGGGT- CGGAGCGGG-- --GGAGCGGGC- --GGAGCGGGG- TGGAGCGGG-- --GAGCGGGAT --GGTCCGGGT- --GAAGCGGGT- AGGAGCGGG-- </pre>                                      |          |

| Alignment Fwd                                                                                                                                              | Logo Fwd | Alignment Rev                                                                                                                                          | Logo Rev |
|------------------------------------------------------------------------------------------------------------------------------------------------------------|----------|--------------------------------------------------------------------------------------------------------------------------------------------------------|----------|
| <b>E_1121_1M-HK_pTH5424.2_ZFA7</b>                                                                                                                         |          |                                                                                                                                                        |          |
| <pre> ---GGGAGGGG--- ---GGGAGGGGA- AAGGGAGGG--- ---TGGGAGGGG--- ---AGGGAGGGG--- ---GGGAGGGGC- ---GGAGGGGAC GGGGGAGGG--- ---AGGAGGGGA- ---GGGAGGGGG- </pre> |          | <pre> ---CCCTCCCC- ---TCCCTCCC-- ---CCCTCCCTT ---CCCTCCCA- ---CCCTCCCT- ---GCCCTCCC-- GTCCCTCC--- ---CCCTCCCC ---TCCCTCCT-- ---CCCCTCCC-- </pre>       |          |
| <b>E_1124_1M-HK_pTH5425.2_ZFA8</b>                                                                                                                         |          |                                                                                                                                                        |          |
| <pre> ---ACAGCACCC- TGCATCCCC-- ---GCATCCCC- CGCATCCTC-- CGCATCCCC-- TGCATCTCC-- ---CATCCCCC ---GCATCCCCG- ---GCAGACCA- ---GCATCTCC- </pre>                |          | <pre> ---GGTGCTGT- ---GGGGATGCA ---GGGGATGC- ---GAGGATCGG ---GGGGATGCG ---GGAGATGCA GGGGGATG-- ---CGGGATGC- ---TGGTGCTGC- ---GGGAGATGC- </pre>         |          |
| <b>E_2954_1M-HK_pTH5426.2_ZFA10</b>                                                                                                                        |          |                                                                                                                                                        |          |
| <pre> CGCTCCGCC-- ---CTCCGCCCT CTCTCCGCC-- ---GCTCCTCCC- CGCTCCACC-- CGCTCCTCC-- ---GCTCCGCCT- ---GCTCCGCC- CGTTCGCC-- CGTCCCCC-- </pre>                   |          | <pre> ---GGCGGAGCG AGGGCGGAG-- ---GGCGGAGAG ---GGGAGGAGC- ---GGTGAGCGG ---GGAGGAGCG ---AGGCGGAGC- ---GGGCGGAGC- ---GGCGGAACG ---GGGGGAGCG </pre>       |          |
| <b>E_1126_1M-HK_pTH5428.2_ZFA15</b>                                                                                                                        |          |                                                                                                                                                        |          |
| <pre> ---TCCGCTGCG- ---CCCGCTGCC- CCCCGCTGC-- ---CCCGCAGCG- GCCCGCTGC-- ---CCCGCTGCG- ---CCGCTGCGG ACCCGCTGC-- ---CCCGCTGGC- ACCCGCAGC-- </pre>            |          | <pre> ---CGCAGCGGA- ---GGCAGCGGG- ---GCAGCGGGG ---CGTGCGGG- ---GCAGCGGGC ---CGCAGCGGG- CCGCAGCGG-- ---GCAGCGGGT ---GCCAGCGGG- ---GCTGCGGGT </pre>      |          |
| <b>E_2956_1M-HK_pTH5473.2_ZFA24</b>                                                                                                                        |          |                                                                                                                                                        |          |
| <pre> ---CTCTCTCC-- ---CTCTTCTCC-- ACTCTTCTC--- CCTCTTCTC--- ---CTTCTCCGG ---GCTTTTCCC- ---CTCTTCTCT-- ---CGTCTCTCC-- ---CACTTCTCC-- ---TCTTCTCCC- </pre>  |          | <pre> ---GGAGAGGAG- ---GGAGAAGAG- ---GAGAAGAGT ---GAGAAGAGG CCGAGAAG--- ---GGGAAAAGC-- ---AGAGAAGAG- ---GGAGAAGCG- ---GGAGAAGTG- ---GGGAGAAGA-- </pre> |          |

| Alignment Fwd                                                                                                                                                             | Logo Fwd | Alignment Rev                                                                                                                                                                | Logo Rev |
|---------------------------------------------------------------------------------------------------------------------------------------------------------------------------|----------|------------------------------------------------------------------------------------------------------------------------------------------------------------------------------|----------|
| <b>E_1068_1M-HK_pTH5569.2_ZFA45</b>                                                                                                                                       |          |                                                                                                                                                                              |          |
| GTGCTACAT--<br>AATCTACAT--<br>AATCTATAT--<br>--TCTACATTA<br>--TCTATATGA<br>GTTCTACAT--<br>-ATCTACATA-<br>-ATCTACATG-<br>--TCTATATAG<br>--TCTACATAG                        |          | --ATGTAGCAC<br>--ATGTAGATT<br>--ATATAGATT<br>TAATGTAGA--<br>TCATATAGA--<br>--ATGTAGAAC<br>--TATGTAGAT-<br>-CATGTAGAT-<br>CTATATAGA--<br>CTATGTAGA--                          |          |
| <b>E_1070_1M-HK_pTH5571.2_ZFA57</b>                                                                                                                                       |          |                                                                                                                                                                              |          |
| --CGTCCTCTA<br>ACCGTCCTC--<br>CCCGTCCTC--<br>--CATCCTCTA<br>--GCGTCCTCT-<br>--CGTCCTCCA<br>-ACGTCCTCT-<br>--CGTCCTCTG<br>--CGTCCTCA-<br>--CGTCCTTTA                       |          | TAGAGGACG--<br>--GAGGACGGT<br>--GAGGACGGG<br>TAGAGGATG--<br>-AGAGGACGC-<br>TGGAGGACG--<br>-AGAGGACGT-<br>CAGAGGACG--<br>-TGAGGACGG-<br>TAAAGGACG--                           |          |
| <b>E_1073_1M-HK_pTH5574.2_ZFA75</b>                                                                                                                                       |          |                                                                                                                                                                              |          |
| ----GATGCCGAG<br>---GGATGCCGG-<br>-AGGGATCCC---<br>--GAGATGCCG--<br>--TCGATGCCG--<br>----GATGCCGGT<br>TAAGGATGC----<br>--AGGATGCCG--<br>-AAGGATGCC---<br>GGGAGATGC----    |          | CTCGGCATC----<br>-CCGGCATCC---<br>---GGGATCCCT-<br>--CGGCATCTC--<br>--CGGCATCGA--<br>ACCGGCATC----<br>----GCATCCTTA<br>---CGGCATCCT--<br>---GGCATCCTT-<br>----GCATCTCCC      |          |
| <b>E_1086_1M-HK_pTH5576.2_ZFA93</b>                                                                                                                                       |          |                                                                                                                                                                              |          |
| ATCCGCTTC--<br>--CCGCTTCGC<br>-ACCGCTTCA-<br>-ACCGCTTCG-<br>GACCGCTTC--<br>TACCGCTTC--<br>--CCGCTTCAG<br>--CCGCTTCAT<br>--CCGCTTCGT<br>-TCCGCTTCA-                        |          | --GAAGCGGAT<br>GCGAAGCGG--<br>-TGAAGCGGT-<br>-CGAAGCGGT-<br>--GAAGCGGTC<br>--GAAGCGGTA<br>CTGAAGCGG--<br>ATGAAGCGG--<br>ACGAAGCGG--<br>-TGAAGCGGA-                           |          |
| <b>E_1076_1M-HK_pTH5578.2_ZFA107</b>                                                                                                                                      |          |                                                                                                                                                                              |          |
| TACCACCTC----<br>--CAACCTCAC--<br>-GCAACCTCA----<br>-GCAACCTCC--<br>---CACCTCACC--<br>CGCAACCTC----<br>---AACCTCCTA--<br>TACAACCTC----<br>---CTACCTCGC--<br>----CCTCACCGT |          | ----GAGGTGGTA<br>---GTGAGGTTG--<br>----TGAGGTTGC-<br>---GGAGGTTGC-<br>---GGTGAGGTTG--<br>----GAGGTTGCC<br>--TAGGAGGTT--<br>----GAGGTTGTA<br>---GCGAGGTTAG--<br>ACGGTGAGG---- |          |

| Alignment Fwd                                                                                                                                               | Logo Fwd | Alignment Rev                                                                                                                                            | Logo Rev |
|-------------------------------------------------------------------------------------------------------------------------------------------------------------|----------|----------------------------------------------------------------------------------------------------------------------------------------------------------|----------|
| <b>E_1077_1M-HK_pTH5580.2_ZFA145</b>                                                                                                                        |          |                                                                                                                                                          |          |
| <pre> ---TCCATTCCA- ---CCCATTCCT- ---CCCATCCGC- TCCGCCGTA---- ---ACCCTTCCG- ---GCCATTCCA- ---CCATTCCAC- ---GCCGTTCCA- ---GCCTTTCCC- ---ACCCCTTCC- </pre>    |          | <pre> -TGGAATGGA--- -AGGAATGGG--- -GCGGATGGG--- ----TACGGCGGA -CGGAAGGGT--- -TGGAATGGC--- GTGGAATGG--- -TGGAACGGC--- -GGGAAGGGC--- --GGAAGGGT-- </pre>   |          |
| <b>E_1079_1M-HK_pTH5581.2_ZFA152</b>                                                                                                                        |          |                                                                                                                                                          |          |
| <pre> TCCCACCGC---- ----ACCGCAGTA --CCCACCGCA--- GTGCACCGC---- ---CACCGCAGT- ---CACCGCACT- --CCACCGCAC-- --CCACCGCAG-- --CAACCGCAC-- --CACCGCACC- </pre>    |          | <pre> ----GCGGTGGGA TACTGCGGT---- --TGCGGTGGG- ----GCGGTGCAC -ACTGCGGTG--- -AGTGCCTGG--- --GTGCGGTGG-- --CTGCGGTGG-- --GTGCGGTG-- --GGTGCCTG-- </pre>    |          |
| <b>E_1080_1M-HK_pTH5582.2_ZFA160</b>                                                                                                                        |          |                                                                                                                                                          |          |
| <pre> ---CGCTATAGC- ----GCTATAGCA --TCGCTATAG-- -CTCGCTATA--- --ACGCTATAG-- ----GTTGTAGCA ----AACATAGCA --TCGCTATAA-- CCTCGCTAT--- ----GCTATAACA </pre>     |          | <pre> -GCTATAGCG--- TGCTATAGC--- --CTATAGCGA-- --TATAGCGAG- --CTATAGCGT-- TGCTACAAC--- TGCTATGTT--- --TTATAGCGA-- ----ATAGCGAGG TGTATATAGC--- </pre>     |          |
| <b>E_1096_1M-HK_pTH5584.2_ZFA169</b>                                                                                                                        |          |                                                                                                                                                          |          |
| <pre> --ACCGCACCG-- -TACCGCACC--- -CGCCACACC--- --CCACACCGC- -AGCCGCACC--- -CGCCGCACC--- GCGCCGCAC--- --ACCGCTCCC--- --ACCACACC--- ----CGCACCGCA </pre>     |          | <pre> --CGGTGCGGT-- --GGTGCGGTA- --GGTGCGGCG- -GCGGTGTGG-- --GGTGCGGCT- --GGTGCGGCG- --GTGCGGCGC- --GGGAGCGGT-- --GGGTGTGGT-- TCCGCTGCG--- </pre>        |          |
| <b>E_1515_1M-HK_pTH5585.4_ZFA188</b>                                                                                                                        |          |                                                                                                                                                          |          |
| <pre> --ACTTAGTCA--- -GGATTACTC--- -GATTACTCA--- -GATTACTCT--- -GATTACTCC--- --ACTTAGTCC--- ----TACTTAGTC --GCTTAATCA--- ATGATTACT--- --GCTTAGTCC--- </pre> |          | <pre> --TGACTAAGT-- ----GAGTAATCC- --TGAGTAATC-- --AGAGTAATC-- --GGAGTAATC-- --GGACTAAGT-- GACTAAGTA--- --TGATTAAGC-- ----AGTAATCAT --GGACTAAGC-- </pre> |          |



| Alignment Fwd                                                                                                                                                                    | Logo Fwd | Alignment Rev                                                                                                                                                                | Logo Rev |
|----------------------------------------------------------------------------------------------------------------------------------------------------------------------------------|----------|------------------------------------------------------------------------------------------------------------------------------------------------------------------------------|----------|
| <b>E_1498_1M-ME_pTH5470.3_ZFA1</b>                                                                                                                                               |          |                                                                                                                                                                              |          |
| <pre> --GGTGACCC----- --GCAGCACCC----- GGCAGCACCC----- --GGAACACCA----- --GCAACACCC----- --GCAGCACCA----- GGGAGCACCC----- GGCAACACCC----- -----TCCCTTTGT --GTAACACCC----- </pre> |          | <pre> -----GGGTGCACC- -----GGGTGCTGC- -----GGTGCTGCC- -----TGGTGTTCC- -----GGGTGTTGC- -----TGGTGCTGC- -----GGTGCTCCC- -----GGTGTGTTGCC ACAAAGGGA----- -----GGGTGTTAC- </pre> |          |
| <b>E_0493_1M-ME_pTH5471.1_ZFA2</b>                                                                                                                                               |          |                                                                                                                                                                              |          |
| <pre> TGGAGGACC-- --ACAGCCCTA- --GCAGCCCTA- --ACAGCCCA- --CAGCCCAAT TTCCTCCTT-- --CAGCCCTAA --GCAGCCCAA- --GAGTCCTCC AGCAGCCCA-- </pre>                                          |          | <pre> --GGTCCTCCA --TAGGGCTGT- --TAGGGCTGC- --TGGGGCTGT- ATTGGGCTG-- --AAGGAGGAA TTAGGGCTG-- --TTGGGCTGC- GGAGGACTC-- --TGGGCTGCT </pre>                                     |          |
| <b>E_0496_1M-ME_pTH5421.1_ZFA3</b>                                                                                                                                               |          |                                                                                                                                                                              |          |
| <pre> ---GCTGCACGG ---CGCTGCAGC- ---CACTGCAGT- ---CGCTGCACG- ---TGTCCTCAA- ---GCTGCATGT ---TGCTGCACG- TACTACCCA--- AGTAATGTA--- ---ACCTCAGAC </pre>                              |          | <pre> CCGTGCAGC--- --GCTGCAGCG-- --ACTGCAGTG-- --CGTGCACCG-- --TTGAAGACA- ACATGCAGC--- --CGTGCAGCA-- ---TGGTGAGTA ---TACATTACT GTCTGAGGT--- </pre>                           |          |
| <b>E_0497_1M-ME_pTH5422.1_ZFA4</b>                                                                                                                                               |          |                                                                                                                                                                              |          |
| <pre> GGGTACCT----- GGGATCCT----- --GAACCCCTA---- --GGATCCCTA---- --GACCCTTTT----- -----CCCTAGGGA --CGACCCTAG---- --GGTACCTTA---- --AGGGCCCTA---- --TTGACCTTT----- </pre>        |          | <pre> -----AGGGTACCC -----AGGGATCCC -----TAGGGTTCC- -----TAGGGATCC- -----AAAAGGGTC- TCCCTAGGG----- -----CTAGGGTCG-- -----TAGGGTACC- -----TAGGGCCCT- -----AAGGGTCAA- </pre>   |          |
| <b>E_0350_1M-ME_pTH5423.1_ZFA5</b>                                                                                                                                               |          |                                                                                                                                                                              |          |
| <pre> --TCCCGTCC-- --CCCGTCCC- --CCCGTCCA- --ACCGCTCC-- --GCCGCTCC-- ATCCCGCTC--- ---CCGCTCCAC --CCGCTCCG- --TCCGTCCTA- --CCGCTCCT- </pre>                                       |          | <pre> --GGAGCGGGA- --GGGAGCGGG-- --TGGAGCGGG-- --GGAGCGGGT- --GGAGCGGGC- --GAGCGGGAT GTGGAGCGG--- --CGGAGCGGG-- --TGGAGCGGA-- --AGGAGCGGG-- </pre>                           |          |

| Alignment Fwd                                                                                                                                     | Logo Fwd | Alignment Rev                                                                                                                                        | Logo Rev |
|---------------------------------------------------------------------------------------------------------------------------------------------------|----------|------------------------------------------------------------------------------------------------------------------------------------------------------|----------|
| <b>E_0351_1M-ME_pTH5424.1_ZFA7</b>                                                                                                                |          |                                                                                                                                                      |          |
| <pre>--TCCCCTCCC-- --CCTCGACCC-- TACCCCTCC-- --TCCCTCCCT-- --ACCCCTCCC-- --ACCCCTCCA-- --GCCCTCCT-- ---CCCTCCACC --CCCTCCCT-- --ACCCCTCCT--</pre> |          | <pre>--GGGAGGGGA-- --GGTGCAGG-- ---GGAGGGTA --AGGGAGGGA-- --GGAGGGGT-- --TGGAGGGGT-- --AGGAGGGGC-- GGTGGAGGG-- --AGGGAGGGG-- --AGGAGGGGT--</pre>     |          |
| <b>E_0352_1M-ME_pTH5425.1_ZFA8</b>                                                                                                                |          |                                                                                                                                                      |          |
| <pre>--GGTGATGCA- AAGGTGATG--- ---GTGATGCAT ---GGGATGTA- --GGTGATGTA- --AGGTGATGC- --TGGTGATGC-- --CGGTGATGT-- --GGTGATGTC- --GGTGAGGTG-</pre>    |          | <pre>--TGCATCACC-- ---CATCACCTT ATGCATCAC--- --TACATCCCC-- --TACATCACC-- --GCATCACCT-- --GCATCACCA-- --ACATCACCG-- --GACATCACC-- --CACCTCACC--</pre> |          |
| <b>E_0353_1M-ME_pTH5426.1_ZFA10</b>                                                                                                               |          |                                                                                                                                                      |          |
| <pre>CGCTCCGCC--- --CTCCGCCCC- --CTCCGCCAT- CGCTCCCTCC--- --GCTCCTCCC-- ---TCCTCCCCT --GTCCGCCCC-- --GCTCCGCCCC- --CTCCTCCCC- --CTCCTCCAT-</pre>  |          | <pre>---GGCGGAGCG --GGGCGGAG-- --ATGGCGGAG-- ---GGAGGAGCG --GGGAGGAGC- AGGGGAGGA--- --GGCGGAAC- --GGCGGAGC- --GGGAGGAG-- --ATGGAGGAG--</pre>         |          |
| <b>E_0355_1M-ME_pTH5428.1_ZFA15</b>                                                                                                               |          |                                                                                                                                                      |          |
| <pre>TCCCGCTGC-- --CCGCTGCAT --CCGCTGCAC --CCCGTGTCT- GCCCGCTGC-- --CCGCTGCGG --CCCGTGCA- --CCGCTGCC- --CCGCTGCG- ACCCGCTGC--</pre>               |          | <pre>--GCAGCGGGA ATGCAGCGG-- GTGCAGCGG-- --AGCAGCGGG- --GCAGCGGGC CCGCAGCGG-- --TGCAGCGGG- --GCCAGCGGG- --CGCAGCGGG- --GCAGCGGGT</pre>               |          |
| <b>E_0495_1M-ME_pTH5473.1_ZFA24</b>                                                                                                               |          |                                                                                                                                                      |          |
| <pre>--CCTTCTCC-- --CTTTCCCT-- --CTTCTCTCC-- --GCTTTTCCT- ACTTCTCTC--- --GCTTCTCCC- --GCTTTTCCA- ---CTTCTCCCC CCTTCTCTC--- --CTTCTCTCA--</pre>    |          | <pre>--GGAGAAGGG- --AGGAAAAG- --GGAGAAGAG- --AGGAAAAGC-- ---GAGAAGAGT --GGGAGAAGC-- --TGGAAAAGC-- GGGGAGAAG--- ---GAGAAGAGG --TGAGAAGAG-</pre>       |          |

| Alignment Fwd                                                                                                                                            | Logo Fwd | Alignment Rev                                                                                                                                            | Logo Rev |
|----------------------------------------------------------------------------------------------------------------------------------------------------------|----------|----------------------------------------------------------------------------------------------------------------------------------------------------------|----------|
| <b>E_1052_1M-ME_pTH5569.1_ZFA45</b>                                                                                                                      |          |                                                                                                                                                          |          |
| <pre> ---ATGTAGATC --AATGTAGAT- --TATATAGAT- --TCATGTAGA-- --CATGTAGAT- ---ATATAGATT --AATATAGAT- --TAATGTAGA-- ---ATATAGATC GCTATATAG---</pre>          |          | <pre> GATCTACAT--- --ATCTACATT-- --ATCTATATA-- --TCTACATGA- --ATCTACATG-- AATCTATAT--- --ATCTATATT-- --TCTACATTA- GATCTATAT--- ---CTATATAGC</pre>        |          |
| <b>E_1054_1M-ME_pTH5571.1_ZFA57</b>                                                                                                                      |          |                                                                                                                                                          |          |
| <pre> --CGTCCTCTA --CATCCTCTA --CATCCTTTA AACGTCCTC-- --ACGTCCTCT- --GCGTCCTCT- --ACATCCTCT- --CATCCTCTT --CGTCCTTCA --CGTCCTCT-</pre>                   |          | <pre> TAGAGGACG-- TAGAGGATG-- TAAAGGATG-- --GAGGACGTT --AGAGGACGT- --AGAGGACGC- --AGAGGATGT- AAGAGGATG-- TGAAGGACG-- --AGAGGACGG-</pre>                  |          |
| <b>E_1057_1M-ME_pTH5574.1_ZFA75</b>                                                                                                                      |          |                                                                                                                                                          |          |
| <pre> CGATGATGC---- --AGGATGCCG-- ---GGATGCCGC- --GTGATGCCG-- TATCGATAC---- --TAGGATGCC--- ---AGATGCCGA- ----GATGCCGCT ---GGATGCCGG- ----GATGCCGAC</pre> |          | <pre> ----GCATCATCG --CGGCATCCT-- --GCGGCATCC-- --CGGCATCAC-- ----GTATCGATA ---GGCATCCTA- --TCGGCATCT-- AGCGGCATC---- --CCGGCATCC-- --GTCGGCATC---</pre> |          |
| <b>E_0953_1M-ME_pTH5576.1_ZFA93</b>                                                                                                                      |          |                                                                                                                                                          |          |
| <pre> --ACCGCTTCA- --CCGCTTCAT --CCGCTTCAC --GCCGCTTCA- TACCGCTTC-- GACCGCTTC-- --CCGCTTCAA GTCGCTTTC-- --CCGCTTCGA --CCGCTTCTT</pre>                    |          | <pre> --TGAAGCGGT- ATGAAGCGG-- GTGAAGCGG-- --TGAAGCGGC- --GAAGCGGTA --GAAGCGGTC TTGAAGCGG-- --GAAGCGGAC TGAAGCGG-- AAGAAGCGG--</pre>                     |          |
| <b>E_0955_1M-ME_pTH5578.1_ZFA107</b>                                                                                                                     |          |                                                                                                                                                          |          |
| <pre> --ACCACCTCA- AGCAACCTC-- --GCAACCTCA- TGCAACCTC-- TACAACCTC-- --CAGCCTCAT TACCACCTC-- --GCAGCCTCA- --ACAGCCTCA- --ACCACCTCT-</pre>                 |          | <pre> --TGAGGTGGT- --GAGGTTGCT --TGAGGTTGC- --GAGGTTGCA --GAGGTTGTA ATGAGGCTG-- --GAGGTGGTA --TGAGGCTGC- --TGAGGCTGT- --AGAGGTGGT-</pre>                 |          |

| Alignment Fwd                                                                                                                                                  | Logo Fwd | Alignment Rev                                                                                                                                                   | Logo Rev |
|----------------------------------------------------------------------------------------------------------------------------------------------------------------|----------|-----------------------------------------------------------------------------------------------------------------------------------------------------------------|----------|
| <b>E_0957_1M-ME_pTH5580.1_ZFA145</b>                                                                                                                           |          |                                                                                                                                                                 |          |
| <pre> -CCCATCCA-- ---CCTTCCACA --CCTTCCAG- --CCGTCAC- CCCCTTCC--- TACCTTCC--- --CTATTCCAA- --CCGATCCAC- --CCGTTCGCG- -ACCTTCCA-- </pre>                        |          | <pre> --TGGATGGGG- TGTGGAAGG--- -CTGGAAGG-- -GTGGAGCGG-- ---GGAAGGGGG ---GGAAGGTA --TTGGAATAG-- -GTGGATCGG-- -CGGGAACGG-- --TGGAAGGT- </pre>                    |          |
| <b>E_0958_1M-ME_pTH5581.1_ZFA152</b>                                                                                                                           |          |                                                                                                                                                                 |          |
| <pre> ----ACCGCGGTG --GGTGCCAC-- TCCCACCGC--- --AACCGCATT- ---CACCGCTTT- ---TACCGCAGC- --TACCGCAAT- -TGAACCGCA-- --GCACCGCAC- ----ACCGCAATT </pre>             |          | <pre> CACCGCGGT---- --GTGCCAC-- ----GCGGTGGGA -AATGCGGTT--- -AAAGCGGTG--- -GCTGCGGTA--- -ATTGCGGTA--- --TGCGGTTCA- --GTGCGGTGC-- AATTGCGGT---- </pre>           |          |
| <b>E_0959_1M-ME_pTH5582.1_ZFA160</b>                                                                                                                           |          |                                                                                                                                                                 |          |
| <pre> ---GCTATAGCA-- --CGCTATAAC--- --CGCTATAGC--- --CGCTACAGC--- ----TATAGCATA -GCGCTATAG---- --CGTAGAAC--- CTCGCTATG--- --CGCTATGAC--- ---GCCATAGCA-- </pre> |          | <pre> ---TGCTATAGC--- ---GTTATAGCG-- ---GCTATAGCG-- ---GCTGTAGCG-- TATGCTATA---- ---CTATAGCGC- ---GTTCTAGCG-- ---CATAGCGAG ---GTCATAGCG-- --TGCTATGGC--- </pre> |          |
| <b>E_0961_1M-ME_pTH5584.1_ZFA169</b>                                                                                                                           |          |                                                                                                                                                                 |          |
| <pre> -TAACCGCAT--- ATAACCGCA---- --CACCGCAC-- --AACCGCATT- --TACCGCTCC-- ----CCGCACCGC --TACCACACC-- ACCACCGCA---- --CGCCGCACC-- --TACCGCAAT-- </pre>         |          | <pre> ---ATGCGGTTA- ----TGCGGTTAT --GGTGCGGTG-- --AATGCGGTT-- --GGAGCGGTA-- GCGGTGCGG---- --GGTGTGGTA-- ----TGCGGTGGT --GGTGCGGCG-- --ATTGCGGTA-- </pre>        |          |
| <b>E_1499_1M-ME_pTH5585.4_ZFA188</b>                                                                                                                           |          |                                                                                                                                                                 |          |
| <pre> AACTAGTC- GGATTACTC- -ACGTAATCC -ACTTAGTCA TACTTAGTC- TGATTACTC- -GCTTGACCA -GCTTGATCA -GATTACTCT -GCTTAGTCA </pre>                                      |          | <pre> -GACTAAGTT -GAGTAATCC GGATTACGT- TGACTAAGT- -GACTAAGTA -GAGTAATCA TGGTCAAGC- TGATCAAGC- AGAGTAATC- TGACTAAGC- </pre>                                      |          |
